# Supplementary material for: Effects of the COVID-19 Pandemic on Legionella Water Management Program Performance across a United States Lodging Organization
Source: MDPI journal article supplement (doi:10.3390/ijerph20196885), 2023-10-05
Supplement: s1 [file s1]

# Effects of the COVID-19 Pandemic on *Legionella* Water Management Program Performance across a United States Lodging Organization

Jasen M. Kunz <sup>1,\*</sup>, Elizabeth Hannapel <sup>2</sup>, Patrick Vander Kelen <sup>3</sup>, Janie Hils <sup>3,4</sup>, Edward Rickamer Hoover <sup>3</sup> and Chris Edens <sup>2</sup>

## Supplementary Materials

**Table S1.** Environmental Samples Tested for *Legionella* During the COVID-19 Pandemic vs. Before by Period of Detection Among Facilities with any *Legionella* Detection

| Period of <i>Legionella</i> Detection at Facilities | Before Pandemic  |                  | During Pandemic  |                  | Total            |                  |
|-----------------------------------------------------|------------------|------------------|------------------|------------------|------------------|------------------|
|                                                     | Negative Samples | Positive Samples | Negative Samples | Positive Samples | Negative Samples | Positive Samples |
| Only before the pandemic (n=55)                     | 916 (86%)        | 148 (14%)        | 380 (100%)       | 0 (0%)           | 1,296 (90%)      | 148 (10%)        |
| Both before and during the pandemic (n=94)          | 1,984 (78%)      | 566 (22%)        | 939 (63%)        | 544 (37%)        | 2,923 (72%)      | 1,110 (28%)      |
| Only during the pandemic (n=81)                     | 1,247 (100%)     | 0 (0%)           | 719 (67%)        | 350 (33%)        | 1,966 (85%)      | 350 (15%)        |
| Total (n=230)                                       | 4,147 (85%)      | 714 (15%)        | 2,038 (70%)      | 894 (30%)        | 6,185 (79%)      | 1,608 (21%)      |

**Table S2.** Environmental Samples Tested for *Legionella* by *Legionella* Type Result, Water System, and COVID-19 Pandemic Time Period

| Water System                    | Time Period     | SG1 OR Non-SG1   |                  | SG1              |                  | Non-SG1          |                  |
|---------------------------------|-----------------|------------------|------------------|------------------|------------------|------------------|------------------|
|                                 |                 | Negative Samples | Positive Samples | Negative Samples | Positive Samples | Negative Samples | Positive Samples |
| Hot and Cold Water <sup>1</sup> | Before Pandemic | 10594 (94%)      | 714 (6%)         | 11126 (98%)      | 182 (2%)         | 10757 (95%)      | 551 (5%)         |
|                                 | During Pandemic | 5527 (86%)       | 894 (14%)        | 6192 (96%)       | 229 (4%)         | 5720 (89%)       | 701 (11%)        |
| Hot Water                       | Before Pandemic | 6342 (92%)       | 583 (8%)         | 6778 (98%)       | 147 (2%)         | 6473 (93%)       | 452 (7%)         |
|                                 | During Pandemic | 3080 (84%)       | 593 (16%)        | 3520 (96%)       | 153 (4%)         | 3208 (87%)       | 465 (13%)        |
| Cold Water                      | Before Pandemic | 3360 (97%)       | 91 (3%)          | 3429 (99%)       | 22 (1%)          | 3380 (98%)       | 71 (2%)          |
|                                 | During Pandemic | 1960 (89%)       | 245 (11%)        | 2151 (98%)       | 54 (2%)          | 2004 (91%)       | 201 (9%)         |

<sup>1</sup>Data contains all samples, including those of unknown water system (i.e., samples not labelled as hot or cold).

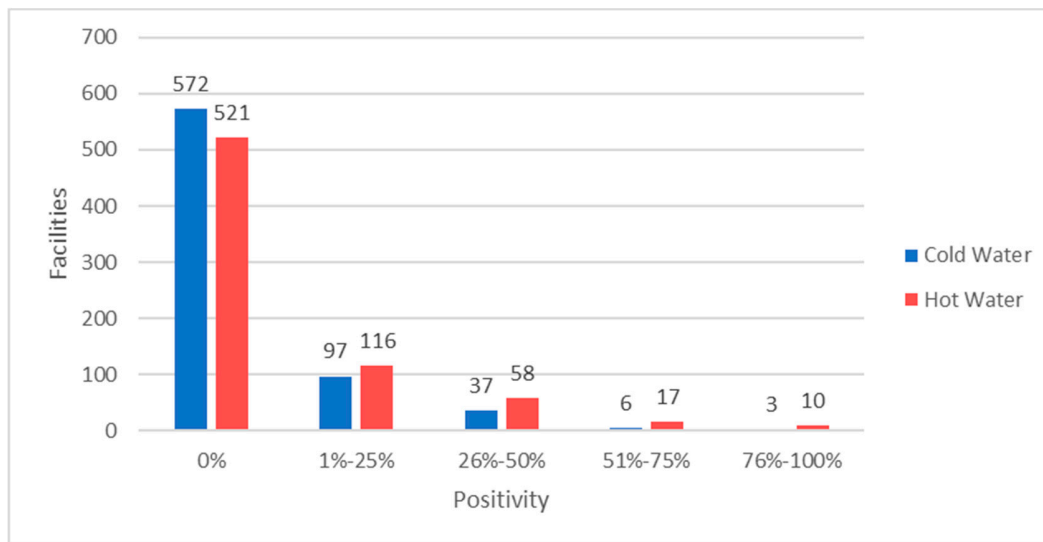

**Figure S1.** Number of Facilities by *Legionella* Percent Positivity in Cold and Hot Water

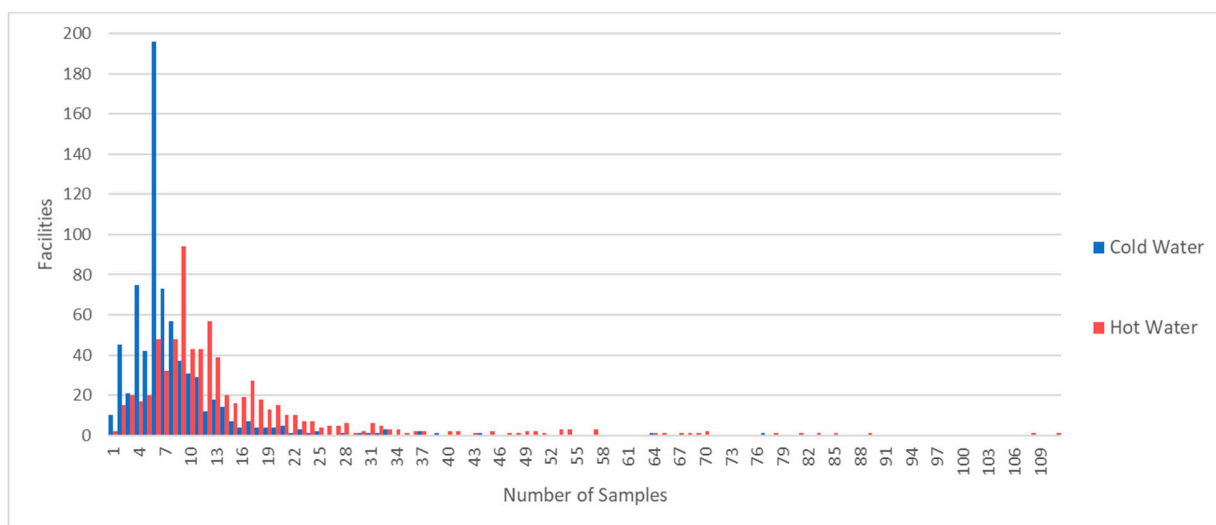

**Figure S2.** Number of Facilities by Number of Environmental Samples Tested in Cold and Hot Water
